**1 Immunization with recombinant enolase of *Sporothrix* spp (rSsEno) confers effective**  
**2 protection against sporotrichosis in mice.**

3 Authors: Deivys Leandro Portuondo Fuentes<sup>1</sup>, Paulo Roberto Dores-Silva<sup>2</sup>, Lucas Souza Ferreira<sup>1</sup>,  
4 Damiana Téllez-Martínez<sup>1</sup>, Caroline Maria Marcos<sup>1</sup>, Maria Luiza de Aguiar Loesch<sup>1</sup>, Fanny  
5 Guzmán Quimbayo<sup>3</sup>, Júlio César Borges<sup>2</sup>, Alexander Batista-Duarte<sup>1</sup>, Iracilda Zeppone Carlos<sup>1\*</sup>

6

7 <sup>1</sup> São Paulo State University (UNESP), School of Pharmaceutical Sciences, Department of Clinical  
8 Analysis, Araraquara, SP, Brazil. <sup>2</sup> São Carlos Institute of Chemistry, University of São Paulo,  
9 São Carlos, SP, P.O. Box 780, 13560–970, Brazil. <sup>3</sup> Núcleo Biotecnológico de Curauma (NBC),  
10 Pontificia Universidad Católica de Valparaíso, Valparaíso, Chile. Correspondence and requests  
11 for materials should be addressed to IZC (email: [iracilda.zeppone@unesp.br](mailto:iracilda.zeppone@unesp.br))

**12 Abstract**

13 In recent years, research has focused on the immunoreactive components of the *S. schenckii* cell  
14 wall that can be relevant targets for preventive and therapeutic vaccines against sporotrichosis, an  
15 emergent worldwide mycosis. In previous studies, we identified a 47-kDa enolase as an  
16 immunodominant antigen in mice vaccinated with purified fungal wall proteins and adjuvants. In  
17 this study, the immunolocalization of this immunogen in the cell wall of *S. schenckii* and *S.*  
18 *brasiliensis* is shown for the first time. In addition, a recombinant enolase of *Sporothrix* spp  
19 (rSsEno) was studied with the adjuvant Montanide Pet-GelA (PGA) as a vaccine candidate. The  
20 rSsEno was produced with high purity. In addition, mice immunized with rSsEno plus PGA  
21 showed increased antibody titers against enolase and increased median survival time compared to  
22 nonimmunized or rSsEno-immunized mice. Enolase immunization induced a predominant T-  
23 helper-1 (Th1) cytokine pattern in splenic cells after in vitro stimulation with rSsEno. Elevated  
24 production of interferon- $\gamma$  (IFN-  $\gamma$ ) and interleukin-2 (IL-2) was observed with other cytokines

25 involved in the innate immune defense, such as TNF-alpha, IL-6, and IL-4, which are necessary  
26 for antibody production. These results suggest that we should continue testing this antigen as a  
27 potential vaccine candidate against sporotrichosis.

28

## 29 **Introduction**

30 Sporotrichosis is a subcutaneous mycosis of subacute or chronic evolution caused by traumatic  
31 inoculation or the inhalation of spores of different species of the *Sporothrix* genus affecting both  
32 humans and animals<sup>1</sup>. The disease has a universal geographical distribution, although it is endemic  
33 in Latin America, including in Peru, México, Colombia, Guatemala and, especially, Brazil, where  
34 in the last 20 years, it became an important zoonosis, with the cat being the main source of  
35 transmission<sup>2-4</sup>. Species of the *Sporothrix* genus are thermodynamorphic fungi with a saprophytic  
36 life at 25 °C and a filamentous form. The parasitic form at 35-37 °C is a yeast<sup>1,5</sup>. The human  
37 infection is acquired in two ways: traumatic inoculation through the skin with materials  
38 contaminated with *Sporothrix* spp or inhalation. Zoonotic transmission principally occurs from  
39 cats to humans<sup>6</sup>.

40 The genus *Sporothrix* is currently classified into two clades: i) the clinical clade, which includes  
41 *S. brasiliensis*, *S. globosa*, *S. luriei* and *S. schenckii* sensu stricto and ii) the environmental clade,  
42 composed mainly of species less pathogenic to man and animals, such as *S. mexicana*, *S. pallida*  
43 and *S. chilensis*<sup>7,8</sup>. Brazil is the only country that has reported all species of the clinical clade, and  
44 *S. brasiliensis* is the most virulent species<sup>9,10</sup>. This species is also the most prevalent during  
45 zoonotic transmission through deep scratches and bites from infected cats<sup>8</sup>. In this country, though  
46 sporotrichosis has been reported in most states, the disease is a neglected disease, particularly in  
47 the state of Rio de Janeiro (JR), where the largest number of cases has been reported, representing  
48 a serious public health problem<sup>3</sup>. The Oswaldo Cruz Foundation (Fiocruz), Rio de Janeiro, a  
49 referral center for the diagnosis and treatment of this mycosis, diagnosed over 4000 human and  
50 feline sporotrichosis cases between 1998 and 2012<sup>11</sup>. More recently, according to data from the

51 epidemiological bulletin of 001/2018 of the sanitary vigilance service of RJ, during 2015 to 2018  
52 (May), 3510 new cases were confirmed<sup>12</sup>, which shows a progressive increase in the incidence and  
53 prevalence of this mycosis.

54 Sporotrichosis is usually controlled through the combined use of itraconazole/potassium iodide or  
55 terbinafine in immunocompetent patients who exhibit the less severe clinical forms of the disease  
56 (lymphocutaneous and fixed cutaneous lesions)<sup>13,14</sup>. However, in immunocompromised patients  
57 with neoplastic diseases, transplantation or AIDS, the conventional treatment with classical  
58 antifungals is generally ineffective<sup>15,16</sup>. The lack of a veterinary and/or human vaccine against this  
59 disease has awakened interest in the identification of *S. schenckii* cell wall immunoreactive  
60 components involved in fungal pathogenesis<sup>17</sup> and the induction of the immune response<sup>18</sup> that can  
61 be used for immunoprophylaxis and immunotherapy against sporotrichosis.

62 In previous studies, our group showed that sera obtained from mice immunized with an *S.*  
63 *schenckii*- cell wall protein (CWP) formulated with the adjuvant aluminum hydroxide (HA)  
64 showed reactivity against two proteins, one of 71 kDa and another of 47 kDa. The latter was  
65 functionally identified as enolase and predicted to be an adhesin by the Fungal RV database<sup>19</sup>.  
66 These immune sera showed opsonizing properties, enhancing the phagocytosis of *S. schenckii*, and  
67 they inhibited the fungal adhesion to fibroblasts *in vitro*. Passive transfer of immune serum to  
68 nonimmunized mice conferred protection against challenges with the fungus. These findings  
69 indicated the induction of protective immunity from the vaccine formulation against experimental  
70 sporotrichosis and the potential use of both antigens for an antifungal vaccine. More recently, we  
71 showed that serum from mice vaccinated with AH-adsorbed CWPs, and serum obtained from mice  
72 immunized with the same antigenic source but formulated with Montanide™ Gel Pet A adjuvant  
73 (PGA), reacted with the *S. brasiliensis* yeast cell wall<sup>20</sup>. Such cross-reactivity, as well as the fact  
74 that both formulations confer protection in mice challenged either with *S. schenckii* or *S.*  
75 *brasileinsis*, suggested the existence of shared immunodominant antigens that could prove

76 beneficial for the simultaneous protection against these species, which are the more virulent of the  
77 genus *Sporothrix*.

78 Enolase (2-phospho-D-glycerate hydrolase, EC 4.2.1.11) is a metalloenzyme that requires the  
79 metal ion magnesium ( $Mg^{2+}$ ) to catalyze the dehydration of 2-phosphoglycerate (2-PG) to  
80 phosphoenolpyruvate (PEP), a product that is used to produce energy (ATP) in eukaryotic and  
81 prokaryotic cells<sup>21</sup>. In mammals, there are at least 4 subunits of enolase:  $\alpha$ -enolase (eno1),  
82 expressed in almost all tissues;  $\beta$ -enolase (eno3), predominantly expressed in adult skeletal  
83 muscle;  $\gamma$ -enolase (eno2), found in neurons and neuroendocrine tissues<sup>22</sup>; and eno4, expressed in  
84 human and mouse sperm<sup>23</sup>. Enolase has been identified on the cell surface of *C. albicans*<sup>24</sup>,  
85 *Plasmodium falciparum*<sup>25</sup>, *Ascaris suum*<sup>26</sup>, *Streptococcus sobrinus*<sup>27</sup>, *S. suis serotipo II*<sup>28</sup>, *S.*  
86 *iniae*<sup>29</sup>, *Plasmodium spp*<sup>30</sup> and *Clonorchis sinensis*<sup>31</sup>. In addition, the immunogenicity and  
87 protective properties of anti-enolase immune response have been reported for diverse  
88 pathogens<sup>24,27,32</sup>.

89 In this study, we reported for the first time an enolase enzyme in the cell wall of *Sporothrix spp*  
90 that is an immunogenic fungal cell wall component. We also showed the enzyme's recognition by  
91 the serum of cats with sporotrichosis. A recombinant *S. schenckii* enolase was obtained, and it was  
92 used to prepare an enolase-based vaccine formulated with PGA adjuvant against *S. brasiliensis* in  
93 mice. The immunogenicity and protective capacity of enolase was observed in an anti-sporothrix  
94 prophylactic vaccine candidate in mice.

## 95 Results

### 96 Production, purification, and characterization of rSsEno

97 Figure 1A shows that rSsEno expressed in the IPTG-induced pET28a::SsEno-transformed-BL21  
98 cells was produced both in the pellet, as well as in the soluble fraction of the lysed cells (Fig. 1,  
99 lane 4 and lane 5, respectively). Based on this result, the rSsEno containing the soluble fraction  
100 was purified by  $Ni^{2+}$ -affinity (results not shown) and preparative size exclusion chromatography

101 (Fig. 1, lane 6), respectively, resulting in an apparent purity of 95% on SDS- PAGE with  
102 Coomassie blue staining. rSsEno had the expected molecular weight of 47 kDa.

103 The rSsEno far UV-CD spectrum shows a positive band at ~195 nm and negative bands at ~209  
104 and 218 nm, which indicate the presence of a folded structure into  $\alpha$ -helices and  $\beta$ -sheets (Fig.  
105 1B). Deconvolution analysis of the rSsEno far UV CD spectra revealed that the secondary structure  
106 of this protein contains higher  $\alpha$ -helices (46%) and a smaller number of  $\beta$ -sheets (12%). Analytical  
107 SEC analysis showed that rSsEno elutes in the column void with a tail after the main peak; this  
108 suggests that the recombinant protein was organized by various oligomeric forms (Fig. 1 C).

#### 109 Sequence Alignment of the *S. schenckii* enolase

110 The sequence alignment analysis among the *S. schenckii*-, *F. catus*- and *H. sapiens*-enolase  
111 revealed an expected result; the enolase from humans and cats showed a degree of identify of 95%  
112 (Fig. 2). However, both enolases showed an identity of 62% with the enolase of *S. schenckii*.

#### 113 Specificity of the anti-rSsEno serum

114 The specificity of the antibodies raised in rSsEno immunized mice was examined by  
115 immunoblotting against recombinant enolase or CWP isolated from Ss16345. As shown in Figure  
116 3 (A), the anti-rSsEno serum reacted with the recombinant protein and against a single reactive  
117 band present in Ss16345CWP with the expected 47 kDa molecular mass, corresponding to the  
118 native enolase<sup>19</sup>. Interestingly, the serum obtained from infected cats with sporotrichosis  
119 confirmed a specific high reactivity against the recombinant protein (Fig. 3B and C), indicating  
120 that, during natural infection, the fungal enolase can induce anti-enolase antibodies. Sera from  
121 uninfected control cats exhibited no immunoreactivity with the rSsEno (Fig. 3B)

122 Enolase is present in the cell wall of *S. schenckii* spp

123 After confirming their specificity, the anti-rSsEno serum was used to detect enolase in the  
124 Ss16345, Ss1099-18, Ss250 and Ss256-cell wall. Figure 4 (A, C, E and G) shows an intense and  
125 significant ( $p < 0.05$ ) median fluorescence intensity (MFI) in yeasts treated with the anti-rSsEno  
126 serum compared to yeast treated with serum from nonimmunized mice (NIS), evidencing enolase  
127 on the cell surface of these strains. The MFI was higher in the cat isolate (Fig. 4F and H) compared  
128 to Ss16345 (Fig. 4B) and Ss1099-18 (Fig. 4D), suggesting that this protein is expressed more on  
129 the cell wall of *S. brasiliensis*, the more virulent species. The presence of enolase on the cell surface  
130 of the studied fungi was also confirmed by transmission microscopy using the immunogold stain.  
131 Figure 4 showed that enolase appears distributed along the cell wall of Ss16345, Ss1099-18, Ss250  
132 and Ss256, which might facilitate its recognition by the host's immune system, although it also  
133 appears, as expected, in the cellular cytoplasm of these species, since its classical function is to  
134 catalyze the reversible conversion of 2-phosphoglycerate to phosphoenolpyruvate<sup>22,33</sup>.

### 135 Antibody response

136 To assess the immunogenic potential of *S. schenckii*-enolase, sera from the experimental group  
137 obtained seven days after the last boost was subjected to ELISA using rSsEno as an antigen. Our  
138 results showed that animals immunized only with enolase stimulated high IgG specific antibody  
139 production (Fig. 5A) compared to the PBS group. However, as expected, the specific antibody  
140 production was significantly higher ( $p < 0.05$ ) when enolase was formulated with the PGA  
141 adjuvant. We also determined the rSsEno-specific IgG1, IgG2a and IgG3 antibodies induced by  
142 each formulation. Mice immunized with rSsEno100 and PGA+rSsEno100 induced higher IgG1  
143 and IgG3 antibody levels against rSsEno compared to the PBS control group, but the level of both  
144 subclasses was higher in the mice immunized with the PGA-adjuvanted formulation (Fig. 5B and  
145 C). The PGA+rSsEno100 formulation was the only formulation that induced the production of  
146 IgG2a (Fig. 5D).

## 147 Cytokine profile analysis

148 The effect of anti-enolase vaccination on the pattern of cytokines was evaluated in the supernatant  
149 of splenocyte cultures from nonimmunized and immunized mice after in vitro stimulation with  
150 rSSEno100. A higher production of IL-2 and IFN- $\gamma$  from the Th1 profile, IL-4 and IL-6, which  
151 are involved in the production of antibodies, and TNF- $\alpha$ , which is released during the innate  
152 immune response (also with IL-6) in mice vaccinated with PGA+rSsEno100, was observed (Fig.  
153 6). All of these cytokines are involved in defense against *S. schenckii*, which is additional evidence  
154 of protective immunogenicity induced by the vaccine formulation.

## 155 Challenge studies

156 To test whether rSsEno in the formulation with PGA adjuvant protects against systemic  
157 sporotrichosis in mice, seven days after booster immunization, mice from each group were  
158 challenged intravenously with  $10^5$  *S. brasiliensis* 250 yeasts, a highly virulent specie. The mortality  
159 of nonimmunized mice was of 100% before 40 days postinfection, while the rSsEno-immunized  
160 mice showed over 50% survival, and those immunized with the PGA-adjuvanted formulation  
161 exhibited the highest percentage of survival (over 90%) at the end of the experiment (45 days  
162 postinfection) (Fig. 7). These results clearly show that enolase may have a potential use for  
163 vaccination against sporotrichosis.

## 164 Discussion

165 In the last two decades, sporotrichosis has been a hyperendemic zoonosis transmitted preferentially  
166 by the domestic cat, especially in Brazil. The high incidence of sporotrichosis together with the  
167 ineffectiveness of treatment, especially in immunocompromised individuals, has reinforced the  
168 need to identify antigenic targets on the cell surface of species of clinical interest of the genus  
169 *Sporothrix* for immunological prevention and therapeutic intervention<sup>17,34</sup>.

170 In this study, the enolase of *S. schenckii* was obtained by recombination with *E. coli*, and it was  
171 purified and characterized. Our results showed that rSsEno was produced successfully with the  
172 expected molecular weight of 47 kDa and with the secondary structure of a type  $\alpha$ -helix at 46%  
173 and a  $\beta$ -sheet at 12%. These values are close to values of 43% for the  $\alpha$ -helix and 15% for the  $\beta$ -  
174 sheet from *Saccharomyces cerevisiae* enolase<sup>35</sup>, suggesting that both enolases have similar  
175 structures. The analyses of the oligomeric state of rSsEno by gel filtration revealed an unexpected  
176 result. We expected that this protein would be assembled in the form of dimers, as reported for  
177 yeast enolase<sup>36-38</sup>. However, our results indicate that the rSsEno was produced with a molecular  
178 weight of 480 kDa, ten times greater than the 47 kDa monomeric unit of this protein.

179 Enolase has been described as a moonlighting protein that exhibits multiple nonglycolytic  
180 functions, probably because of its different multimeric structures<sup>32</sup>. Ehinger *et al.*<sup>39</sup> reported that a-  
181 enolase of *Streptococcus pneumoniae* forms an octamer in solution and that due to its binding to  
182 human plasminogen, it probably resides on the cellular surface of this pathogen and can be  
183 involved in virulence. Wu *et al.*<sup>40</sup> also reported that *Staphylococcus aureus* recombinant enolase  
184 is organized in dimers and octamers and that the latter probably exist *in vivo* since it showed  
185 enzymatic activity *in vitro*. Whether the complex oligomeric state of rSsEno in solution is the same  
186 as its native form in *S. schenckii*, and its functional role *in vivo*, is a subject for future studies.

187 The reactivity of sera from cats with sporotrichosis against rSsEno and the lack of reactivity with  
188 sera from uninfected control cats evidenced the antigenic role and probable immunogenicity of the  
189 *S. schenckii* enolase during the infectious process in these animals. This result, in addition to the  
190 percentage of identity (62%), suggests that *S. schenckii* enolase contains conserved regions distinct  
191 to the enolase present in both hosts (cat and human) of this pathogen. Therefore, enolase can be  
192 an antigenic target for vaccine and/or therapeutic strategies for protection against sporotrichosis in  
193 cat.



194 Different studies have shown that enolase on the cell surface of bacteria, fungus and parasites acts  
195 as a virulence factor that facilitates the colonization and dissemination of these pathogens in the  
196 host<sup>25,38,41</sup>. In this study, we show for the first time that enolase is present on the cellular surface  
197 of *S. schenckii* and *S. brasiliensis* species, and interestingly, this expression was higher on yeast  
198 cell walls from *S. brasiliensis*, suggesting that the level of enolase expression on the cell surface  
199 of species of the genus *Sporothrix* can be related to the invasiveness and virulence of these  
200 pathogens in the host. In this way, Roth *et al.*<sup>42</sup> showed that the level of expression of enolase is  
201 15-fold higher in red blood cells infected with *P. falciparum* compared to uninfected cells. More  
202 recently, Marcos *et al.*<sup>43</sup> observed a considerable increase of this protein in the cell wall of  
203 *Paracocidioides brasiliensis* when the fungus was cultivated in BHI medium enriched with sheep  
204 blood or during fungal infection in mice, suggesting a role for enolase as a virulence factor of these  
205 fungi in host cells.

206 Several studies have shown that the IgG antibody response<sup>44,45</sup> and especially IgG1<sup>46,47</sup>, IgG2a and  
207 IgG3 isotypes<sup>19,20</sup> against the *S. schenckii* and *S. brasiliensis* cell wall proteins is associated with  
208 protection against progressive infection. Our results showed that rSsEno100 and PGA+rSsEno100  
209 stimulated a Th2 (IgG1 and IgG3) and Th1/Th2 (IgG1, IgG2a and IgG3) immune response,  
210 respectively.

211 The generation of a Th1 and Th17 response is necessary for protective immunity against  
212 *Staphylococcus aureus* and *C. albicans*<sup>48</sup>. Ferreira *et al.*<sup>49</sup> demonstrated in a model of *S. schenckii*  
213 infection in BALB/c mice that the Th1 and Th17 immune response were able to control the  
214 infection. Recently, our group reported a similar result in a model of C57BL6 mice subcutaneously  
215 infected with either *S. schenckii* or *S. brasiliensis*. However, the higher virulence of *S. brasiliensis*  
216 caused a long-lasting infection associated with severe tissue lesions that stimulated a regulatory T  
217 cell (Tregs) response with deleterious effects on the Th1 and Th1/Th17 response, although a  
218 compensatory Th17 response was induced<sup>50</sup>. We also demonstrated in an immunoprophylaxis

219 study in BALB/c mice that either aluminum hydroxide adjuvant or PGA, both formulated with the  
220 Ss16345-WCP containing the immunoreactive enolase, induced a Th1, Th2 and Th17 profile, in  
221 addition to high stimulation of specific antibodies that conferred protection in these animals after  
222 challenge with Ss16345 or Ss250<sup>20</sup>.

223 To verify whether rSsEno could be used as an antigenic target for a sporotrichosis vaccine, we  
224 performed a survival study in immunized mice after intravenous infection with the highly virulent  
225 strain Ss250. The survival above 90% seen in mice immunized with PGA+rSsEno100 is strong  
226 evidence of the protective capacity of our vaccine candidate. In addition, the Th1/Th2, and not the  
227 Th17 cytokine profile, observed ex vivo in PGA+rSsEno100-immunized mice played a significant  
228 role in vivo in favoring protection, since rSsEno100-immunized mice showed ex vivo that the  
229 stimulation of Th2 cytokines alone led to decreased survival (~ 52%) postchallenge. Li *et al.*<sup>24</sup>  
230 showed that a Th1 and Th2 immune response pattern induced by recombinant enolase of *C.*  
231 *albicans* emulsified with Freund's adjuvant (AF) was enough to confer protection on C57BL/6  
232 mice challenged with a lethal dose of *C. albicans* strains SC5314 and 3630. In addition, passive  
233 immune serum transfer, characterized by the prevalence of IgG2a- and IgG1-specific antigen  
234 isotypes, also demonstrated effective protection against both fungal *C. albicans* lineages, showing  
235 that antibodies against enolase could be useful to treat of candidiasis. Zhang *et al.*<sup>51</sup> also showed  
236 that the enolase of *Streptococcus suis* serotype 2 plus AF formulation induced a mixed Th1 (IgG2a)  
237 and Th2 (IgG1) response that also conferred protection in challenged animals with two pathogenic  
238 strains of *S. suis*. This same immune response profile and protective efficacy were observed in  
239 mice immunized with the *Ascaris suum* enolase after infection with infective larvae of this  
240 parasite<sup>52</sup>.

241 In summary, for the first time, a recombinant form of *S. schenckii* (rSsEno) enolase was obtained  
242 and structurally characterized. The molecular mass of rSsEno determined by size exclusion  
243 chromatography was 480 kDa, which shows that this protein is organized as more than two

244 monomeric units. This organization is different from the enolases from other fungi. The  
245 identification of enolase on the cell wall of *S. brasiliensis* and *S. schenckii* and its recognition by  
246 serum from cats affected with sporotrichosis are reported in this study. A vaccine formulation of  
247 rSsEno plus PGA adjuvant induced a Th1/Th2 response and high titers of specific antibodies that  
248 favored the protection to mice challenged with a highly virulent *S. brasiliensis* isolate. All these  
249 results show that the enolase of *Sporothrix* spp may be a vaccine antigen candidate for feline  
250 sporotrichosis prevention.

251

## 252 **Materials and methods**

### 253 **Animals**

254 For this study, male 5-7-week-old BALB/c mice were purchased from “Centro Multidisciplinar  
255 para Investigação Biológica na Área da Ciência de Animais de Laboratório” (CEMIB),  
256 Universidade de Campinas (UNICAMP), São Paulo, Brasil. Animals were housed in individually  
257 ventilated cages in an ambient controlled temperature and 12-h light/dark cycles. All animals were  
258 acclimatized to the conditions for 1 week before the experiments, and water and food was offered  
259 ad libitum. This study was carried out in strict accordance with the recommendations for the Guide  
260 for the Care and Use of Laboratory Animals of the National Institutes of Health, and the protocols  
261 were approved by the Ethics Committee for Animal Use in Research of Araraquara’s School  
262 of Pharmaceutical Sciences from UNESP (Protocol CEUA/FCF/CAR no. 57/2015).

### 263 **Microorganisms**

264 The strains *S. schenckii* ATCC 16345 (Ss16345), *S. schenckii* 1099-18 (Ss1099-18), *S. brasiliensis*  
266 250 (Ss250, GenBank: KC693883.1) and *S. brasiliensis* 256 (Ss256, KC693889.1), both *S.*

267 *brasiliensis* strains isolated from feline sporotrichosis, and Ss16345 were kindly provided by the  
268 Oswaldo Cruz Foundation, Rio de Janeiro, Brazil. Ss1099-18 was provided by Dr. Celuta Sales  
269 Alviano at the Institute of Microbiology, Federal University of Rio de Janeiro (Brazil). Mycelial-  
270 to-yeast phase conversion was accomplished as previously described by Ferreira and  
271 collaborators<sup>49</sup>.

272

273 Expression and purification of recombinant *S. schenckii* Enolase (rSsEno)The gene that encodes  
274 *S. schenckii* enolase with 438 amino acids and a molecular mass of 47 kDa (Accession Code:  
275 ERS97971.1 of the GenBank database) was synthesized by Epoch Life Science Inc. between the  
276 *Nde I* and *Eco RI* restriction enzymes in fusion with a histidine tag at the N-terminus. It was  
277 subcloned into the pET28a plasmid and optimized for production in *E. coli* (pET28a::SsEno).

278 *Escherichia coli* DH5 $\alpha$  was used as the cloning host for the propagation of pET28a::SsEno on  
279 lysogeny broth (LB) agar medium containing 30  $\mu$ g/mL of kanamycin, and the authenticity of the  
280 cloning procedure was confirmed by sequencing. For recombinant protein expression, *E. coli*  
281 BL21 cells cotransformed with pET28a::SsEno were grown at 37 °C in LB medium containing 30  
282  $\mu$ g/mL of kanamycin until they reached an OD<sub>600</sub> in the range of 0.5-0.7. The expression of rSsEno  
283 was induced by 0.2 mmol/L of isopropyl  $\beta$ -D-1-thiogalactopyranoside (IPTG) at 30°C for 4 h. The  
284 cells were separated by centrifugation for 20 min at 8000 rpm, and the pellet was resuspended in  
285 20 mL buffer A (NaPO<sub>4</sub> 20 mM, NaCl 500 mM and imidazole 20 mM, pH 7,4) containing 5 U of  
286 DNase (Promega) and 30  $\mu$ g/mL lysozyme (Sigma) for 30 min on ice. The cell homogenate was  
287 sonicated, filtrate and then centrifuged at 19,000 rpm for 20 min at 4 °C. The rSsEno-containing  
288 supernatant was filtered through a 0.45  $\mu$ m nitrocellulose membrane (Millipore) and further  
289 subjected to Ni<sup>2+</sup>-affinity chromatography in buffer A. The rSsEno was then eluted in buffer B  
290 (NaPO<sub>4</sub> 20 mM, NaCl 500 mM and imidazole 500 mM, pH 7,4). After elution, the material  
291 obtained was subjected to size exclusion chromatography (SEC) with a Superdex 200 pg 16/60

292 column (GE Healthcare Life Sciences) in Tris-HCl 25 mM, NaCl 100 mM and  $\beta$ -mercaptoethanol  
293 2 mM at pH 7.5, and the eluted protein was concentrated using the *Amicon® Ultra 15 mL*  
294 *3k* device (Millipore) after being dialyzed for 24 h at 4°C against phosphate buffer saline (PBS,  
295 pH 7,2-7,4). The rSsEno concentration was measured by the BCA assay (Pierce), and the efficacy  
296 of the expression and purification processes was assessed by 12% SDS-polyacrylamide gel  
297 electrophoresis (SDS-PAGE).

#### 298 Circular dichroism (CD)

299 Secondary structure analysis was performed by far-UV (195-260 nm) CD in a J-815  
300 spectropolarimeter (Jasco Inc.) coupled to a Peltier PFD 425S for the temperature control system.  
301 rSsEno was tested in Tris-HCl buffer (pH 7.5), 100 mM NaCl and 2 mM  $\beta$ -mercaptoethanol, and  
302 the secondary structure content was estimated using the CDNN Deconvolution program<sup>53</sup>. In  
303 addition, the rSsEno oligomeric state was analyzed by analytical size exclusion chromatography  
304 on a Superdex 200 GL 10/30 column (GE Healthcare LifeSciences) coupled to a ÄKTA Prime  
305 Plus (GE Healthcare LifeSciences) and equilibrated with the same buffer described above.

#### 306 Extraction of Ss16345CWP

307 Extraction of the Ss16345CWPs was performed per Portuondo *et al.*<sup>19</sup>. Ss16345 yeast cells  
308 collected from logarithmically growing cultures were incubated with a protein extraction buffer  
309 containing 2 mM dithiothreitol, 1 mM phenylmethylsulfonyl fluoride, and 5 mM EDTA in This-  
310 HCl buffer for 2 h at 4°C under mild agitation. The Ss16345CWP-containing supernatant was  
311 collected, dialyzed against PBS, and then concentrated using the Amicon Ultra 15 MWCO  
312 concentrator (Millipore). The proteins were then precipitated by overnight incubation with 10%  
313 (w/v) trichloroacetic acid in acetone at 4°C, and the resulting pellets were washed in ice-cold  
314 acetone, dried in a SpeedVac® and reconstituted PBS. The protein concentration was measured  
315 by the BCA assay (Pierce).

316 SDS-PAGE, Western blot analysis

317 Samples containing 20 µg of protein Ss16345CWP and purified rSsEno (5 µg) were resolved on  
318 an SDS-PAGE 12% as described by Laemmli<sup>54</sup>. Two gels were stained with Coomassie brilliant  
319 blue R250, and the other gels were transferred to 0.45-µm-nitrocellulose membranes (GE  
320 Healthcare) using a mini Tank VEP-2 electroblotting system (Owl Separation Systems, Thermo  
321 Scientific) at 50 mM for 3 h. The membrane-cut strips were saturated with 5% dried skim milk in  
322 PBS for 4 h at 37°C, and the strips containing rSsEno were incubated overnight at room  
323 temperature (RT) with anti-rSsEno serum (obtained from BALB/c mice seven days after being  
324 immunized subcutaneously twice at 14 day intervals with 100 µg rSsEno emulsified with Freund's  
325 adjuvant) or sera from cats with confirmed sporotrichosis (n=34) obtained from INI/Fundação  
326 Oswaldo Cruz, Rio de Janeiro, Brazil. One strip containing Ss16345CWP was incubated with anti-  
327 rSsEno. Sera from naïve mice or sera from cats with no evidence of sporotrichosis (n=3) were  
328 utilized as negative controls. All sera were diluted 1:100 in PBS. After three washes with PBS, the  
329 strips were further incubated for 2 h with goat anti-mouse IgG (Sigma-Aldrich) diluted 1:500 or  
330 goat anti-feline IgG (Southern Biotech) diluted 1:1000. Both antibodies were conjugated with  
331 horseradish peroxidase (HRP). Protein signals were *visualized* by adding 3,3'-diaminobenzidine  
332 *plus* hydrogen peroxide.

333 Alignment of enolase sequences

334 We compared conservation (similarity) between the enolase of *S. schenckii* and the cat and human  
335 enolase. The enolase amino acid sequences of *S. schenckii* (GenBank Accession No.ERS97971.1  
336 and *Felis catus* (UniProt Accession: M3 WCP0\_FELCA, Homo sapiens (UniProt Accession:  
337 P06733) were aligned through the default settings within Clustal Omega<sup>55</sup>.

338 Flow cytometry

339 To demonstrate the enolase on the cell wall of Ss16345, Ss 1099-18, Ss250 and Ss256,  $10^6$  yeasts  
340 were incubated for 1 h at 37°C with anti-rSsEno serum. Serum from naïve mice was used as a  
341 nonspecific binding control at a 1:50 dilution. After incubation, cells were washed twice with PBS  
342 for 1 h at 37°C and then incubated with a FITC-conjugated rabbit anti-mouse IgG antibody (Sigma-  
343 Aldrich) at a 1:500 dilution. After washing, samples were acquired with the BD Accuri C6 flow  
344 cytometer (BD Biosciences). The acquisition threshold was set to 50,000 on FSC-H for debris  
345 exclusion, and at least 50,000 events were effectively included in each analysis. Binding of serum  
346 antibodies to the yeast cell surface was assessed through the median fluorescence intensity (MFI)  
347 on the FL1 channel using the flow cytometer's proprietary software.

#### 348 Electron microscopy

349 To visualize enolase on the Ss16345, Ss1099-18, Ss250 and Ss256 cell surface, we performed pre-  
350 embedding immunogold experiments using intact yeast cells this fungus, as described  
351 previously<sup>43</sup>. Briefly, the yeast cells were fixed with 2.5 glutaraldehyde v/v in 0.1 M cacodylate  
352 buffer, pH 7.2, for 24 h at 4°C. Ultrathin sections of each fungus were prepared and treated  
353 overnight with the primary antibody (polyclonal anti-rSsEno) diluted 1:100 in PBS at 4°C. The  
354 grids were then incubated overnight with the labeled Au-conjugated secondary antibody rabbit  
355 IgG (10 nm average particle size, 1:20) at 4°C. The grids were stained with 4% uranyl acetate and  
356 lead citrate and observed with a Jeol 1011 transmission electron microscope (Jeol, Tokyo, Japan).  
357 Controls were obtained by incubating the ultrathin sections with NS.

#### 358 Immunization schedule

359 BALB/c mice (n = 5) were injected subcutaneously (s.c.) three times in the back of the neck, with  
360 2-week intervening period, with one of the following formulations diluted in 100 µl of PBS:  
361 rSsEno100 alone (100 µg), PGA+rSsEno100 [10% Montanide<sup>TM</sup> Pet Gel A (PGA), SEPPIC,  
362 France plus 100 µgrSsEno] or PBS alone as a negative control. One week after the later

363 immunization, mice were euthanized in a CO<sub>2</sub> chamber and bled by heart puncture to obtain serum,  
364 which was aliquoted and stored at -20°C until use.

### 365 Quantification of the rSsEno-specific antibody response by ELISA

366 rSsEno IgG, IgG1, IgG2a and IgG3 antibody titration was conducted as described by Portuondo  
367 *et al.*<sup>19</sup> with some modifications. Briefly, a 96-well ELISA plate (Costar) was coated with 5 µg  
368 rSsEno/mL in PBS and incubated overnight at 4 °C. The plate was washed with washing buffer  
369 (0.1% Tween 20 in PBS) and then saturated for 1 h at RT with blocking buffer (5% dried skim  
370 milk in washing buffer). Next, dilutions (1:100 in blocking buffer) of the serum samples were  
371 added to each well and incubated for 2 h at RT. After washing, 100 µl/well of peroxidase-  
372 conjugated anti-mouse IgG (1/500) (Sigma) in blocking buffer was added and incubated at 37°C  
373 for 1 h. For determination of the IgG1, IgG2a and IgG3 subclasses, ELISA plates coated as before  
374 were first incubated with an unconjugated rabbit anti-mouse IgG1, IgG2a or IgG3 (Bio-Rad) at  
375 37°C for 1 h and then with a peroxidase-conjugated goat anti-rabbit IgG (Sigma) overnight at 4°C.  
376 After exhaustive washing, immune complexes were revealed by incubation with  
377 tetramethylbenzidine for 30 min at RT. The reaction was stopped by the addition of 50 µL/well 1  
378 M H<sub>2</sub>SO<sub>4</sub>, and the absorbance was read with an ELISA reader (Multiskan ascent, Labsystem) at  
379 450 nm.

### 380 Cytokine production

381 To evaluate the cytokine production induced by rSsEno-stimulated spleen cells,  
382 splenocytes isolated from each group of animals were harvested seven days after the third  
383 immunization. Collected cells were washed, suspended in complete RPMI-1640 medium (cRPMI;  
384 RPMI-1640 medium containing 0.02 mM 2-mercaptoethanol, 100 U/mL penicillin, 100 U/mL  
385 streptomycin, 2 mM l-glutamine, and 5% fetal bovine serum) and then plated in triplicate in 96-  
386 well plates (Costar, USA) to final concentration 2.5x10<sup>6</sup> cells/mL with 20 µg of rSsEno/mL in



387 cRPMI for 24 h at 37°C with 5% CO<sub>2</sub>. Concanavalin A (0.25 μg/ml) or cRPMI alone were used  
388 as positive and negative controls, respectively. Supernatant-accumulated cytokine concentrations  
389 (IL-2, IL-10, IL-4, IL-6, IFN-γ, TNF-α, and IL-17A) were simultaneously measured using the  
390 mouse Th1/Th2/Th17 cytokine cytometric bead array (CBA) kit (BD Biosciences). Briefly, 50 μL  
391 of each standard or supernatant sample was incubated for 2 h at RT with an equal volume of  
392 PhycoErythrin (detection reagent) and the mixed capture beads. After incubation, the samples were  
393 centrifuged at 200 × g for 5 min, and the pellet was resuspended in 300 μL of wash buffer and  
394 analyzed using a flow cytometer (BD Accuri C6, BD Biosciences).

#### 395 Protection assay

396 BALB/c mice (n=10) were immunized according to the immunization schedule described  
397 previously. Seven days after the final boost, mice were challenged intravenously with 10<sup>5</sup> of the  
398 highly virulent *S. brasiliensis* Ss250 yeast in 0.1 mL of PBS via the tail vein, as described by Ishida  
399 et al.<sup>56</sup>. Animals were monitored daily for 45 days postinfection to determine the survival curve  
400 and efficacy of each vaccine formulation.

#### 401 Statistical analysis

402 Data were analyzed using one-way analysis of variance (ANOVA) followed by Tukey's post-test  
403 using Graph Pad Prism 5. In this study, a p value of < 0.05 was considered significant. The results  
404 are expressed as the mean ± SD.

#### 405 Acknowledgments

406 This work was supported by Fundação de Amparo à Pesquisa do Estado de São Paulo (FAPESP,  
407 grant number 2015/09340-4, 2017/13228-0 and 2017/26774-3). We are also grateful to Dr. Sandro  
408 Antonio Pereira (Instituto Nacional de Infectologia Evandro Chagas – INI, Fiocruz, Rio de Janeiro,  
409 RJ) for providing the *S. brasiliensis* isolate and sera from cats used in this study.

410

411 Contributions

412 Conception of the work: D.L.P.F., A.B.D., I.Z.C. Design of research: D.L.P.F., A.B.D., I.Z.C.,  
413 P.R.D.S; L.S.F., D.T.M Performed experiments: D.L.P.F., A.B.D., P.R.D.S; L.S.F., D.T.M.,  
414 M.L.A.L.,C.M.M., Data analysis: D.L.P.F., A.B.D., I.Z.C., P.R.D.S; L.S.F., D.T.M.,  
415 C.M.M.,F.G.Q., J.C.B. Interpreted results of experiments: D.L.P.F., A.B.D., I.Z.C., Prepared  
416 figures: D.L.P.F., A.B.D., I.Z.C., Wrote the manuscript: D.L.P.F., A.B.D., I.Z.C. All authors  
417 contributed to the final version of the paper and gave final approval for publication.

418 Conflicts of interest

419 The authors declare no commercial or financial and non-financial conflict of interest.

420 References

- 421 1. Barros, M. B., de Almeida, Paes. R, Schubach, A.O. *Sporothrix schenckii* and  
422 sporotrichosis. *Clin Microbiol Rev* 24: 633–654 (2011).
- 423 2. Chakrabarti, A. Bonifaz, A., Gutierrez-Galhardo, M.C., Mochizuki, T.Li. S. Global  
424 epidemiology of sporotrichosis. *Medical mycology* 53: 3-14 (2015).
- 425 3. Carlos, I.Z. & Batista-Duharte, A. Sporotrichosis: An Emergent Disease.  
426 In *Sporotrichosis. Springer International Publishing* 1-23 (2015).
- 427 4. Lopes-Bezerra, L.M., Mora-Montes, H.M., Zhang, Y., Nino-Vega, G., Rodrigues,  
428 A.M., de Camargo, Z.P. & de Hoog, S. Sporotrichosis between 1898 and 2017: The  
429 evolution of knowledge on a changeable disease and on emerging etiological  
430 agents. *Medical mycology* 56(suppl\_1), S126-S143 (2018).
- 431 5. Lopes-Bezerra LM, Schubach, A. & Costa, R.O. *Sporothrix schenckii* and  
432 sporotrichosis. *Anais da Academia Brasileira de Ciências* 78(2): 293-308 (2006).

- 433 6. Zhou, X., Rodrigues, A.M., Feng, P., Hoog, G.S. Global ITS diversity in the *Sporothrix*  
434 *schenckii* complex. *Fungal Divers* 66, 153-165 (2014).
- 435 7. Rodrigues, A.M., de Hoog, G.S., de Camargo, Z.P. Sporothrix species causing  
436 outbreaks in animals and humans driven by animal-animal transmission. *PLoS Pathog*  
437 12: e1005638 (2016).
- 438 8. Orofino-Costa, R., Macedo, P.M.D., Rodrigues, A.M. & Bernardes-Engemann, A.R.  
439 Sporotrichosis: an update on epidemiology, etiopathogenesis, laboratory and clinical  
440 therapeutics. *Anais brasileiros de dermatologia* 92(5), 606-620 (2017).
- 441 9. Arrillaga-Moncrieff, I., Capilla, J., Mayayo, E., Marimon, R., Mariné, M., Gené, J.,  
442 Cano, J., Guarro, J. Different virulence levels of the species of *Sporothrix* in a murine  
443 model. *Clin Microbiol Infect* Jul; 15(7):651-5 (2009).
- 444 10. Boechat, J.S., Oliveira, M.M.E., Almeida-Paes, R., Gremião, I.D.F., Machado,  
445 A.C.S., Oliveira, R.V.C., Figueiredo, A.B.F., Rabello, V.B.S., Silva, K.B.L., Zancopé-  
446 Oliveira, R.M., Schubach, T.M.P., Pereira, S.A. Feline sporotrichosis: associations  
447 between clinical-epidemiological profiles and phenotypic-genotypic characteristics of  
448 the etiological agents in the Rio de Janeiro epizootic area. *Mem Inst Oswaldo Cruz*  
449 *Mar*;113(3):185-196 (2018).
- 450  
451 11. Gremião, I. D., Menezes, R. C., Schubach, T. M., Figueiredo, A. B., Cavalcanti, M. C.,  
452 & Pereira, S. A. Feline sporotrichosis: epidemiological and clinical aspects. *Medical*  
453 *mycology* 53(1), 15-21 (2015).
- 453 12. Almeida, P., Giordano, C. Sporotrichosis Epidemiological Bulletin 001/2018.  
454 Secretaria de Estado de Saude do Rio de Janeiro, Boletim Epidemiológico, 2018 [in  
455 Portuguese].
- 456 13. Batista-Duharte, A., Pereira, S.A., Freitas, D.F.S., Fuentes, D.P., Gutierrez-Galhardo,  
457 M.C., Carlos, I.Z. Therapeutic and prophylactic tools for sporotrichosis: current

- 458 strategies and future tendencies. In: Sporotrichosis. *Springer International Publishing*  
459 p. 147–77 (2015).
- 460 14. Bonifaz, A. & Tirado-Sánchez, A. Cutaneous disseminated and extracutaneous  
461 sporotrichosis: Current status of a complex disease. *Journal of Fungi* 3(1), 6 (2017).
- 462 15. Aung, A.K., The, B.M., McGrath, C. & Thompson, P.J. Pulmonary sporotrichosis: case  
463 series and systematic analysis of literature on clinico-radiological patterns and  
464 management outcomes. *Medical mycology* 51(5), 534-544 (2013).
- 465 16. Mahajan, V.K. Sporotrichosis: an overview and therapeutic options. *Dermatol Res*  
466 *Pract* 272376 (2014).
- 467 17. Alba-Fierro, C.A., Pérez-Torres, A., Toriello, C., Pulido-Camarillo, E., López-Romero  
468 E., Romo-Lozano, Y. *et al.* Immune Response Induced by an Immunodominant 60 kDa  
469 Glycoprotein of the Cell Wall of *Sporothrix schenckii* in Two Mice Strains with  
470 Experimental Sporotrichosis. *J Immunol Res* 6: 52-5831 (2016).
- 471 18. Carlos, I.Z. Therapeutic and prophylactic tools for sporotrichosis: current Carlos, I.Z.,  
472 Sassá, M.F., da Graça, Sgarbi. D.B., Placeres, M.C.P. & Maia, D.C.G. Current research  
473 on the immune response to experimental sporotrichosis. *Mycopathologia* 168(1), 1-10  
474 (2009).
- 475 19. Portuondo, D.L., Batista-Duharte, A., Ferreira, L.S., Martínez, D.T., Polesi, M.C.,  
476 Duarte, R.A. *et al.* A cell wall protein-based vaccine candidate induce protective  
477 immune response against *Sporothrix schenckii* infection. *Immunobiology* 221: 300-309  
478 (2016).
- 479 20. Portuondo, D.L., Batista-Duharte, A., Ferreira, L.S., de Andrade, C.R., Quinello, C.,  
480 Téllez-Martínez, D. & Carlos, I.Z. Comparative efficacy and toxicity of two vaccine  
481 candidates against *Sporothrix schenckii* using either Montanide™ Pet Gel A or  
482 aluminum hydroxide adjuvants in mice. *Vaccine* 35(34), 4430-4436 (2017).

- 483 21. Díaz-Ramos, A., Roig-Borrellas, A., García-Melero, A. & López-Aleman, R.  $\alpha$ -  
484 Enolase, a multifunctional protein: its role on pathophysiological situations. *BioMed*  
485 *Research International* (2012).
- 486 22. Ji, H. Wang. *et al.* Progress in the biological function of alpha-enolase. *Animal*  
487 *Nutrition* 2(1), 12-17(2016).
- 488 23. Nakamura, N., Dai, Q., Williams, J., Goulding, E. H., Willis, W. D., Brown, P. R., &  
489 Eddy, E. M. Disruption of a spermatogenic cell-specific mouse enolase 4 (eno4) gene  
490 causes sperm structural defects and male infertility. *Biology of reproduction* 88(4)  
491 (2013).
- 492 24. Li, W., chu, Hu. X., Zhang, X., Ge, Y., Zhao, S. Hu. Y & Ashman, R.B. Immunization  
493 with the glycolytic enzyme enolase confers effective protection against *Candida*  
494 *albicans* infection in mice. *Vaccine* 29(33), 5526-5533 8 (2011).
- 495 25. Pal-Bhowmick, I., Mehta, M., Coppens, I., Sharma, S. & Jarori, G.K. Protective  
496 properties and surface localization of *Plasmodium falciparum* enolase. *Infection and*  
497 *immunity* 75(11), 5500-5508 (2007).
- 498 26. Chen, N., Yuan, ZG., Xu, MJ., Zhou, D.H., Zhang, X.X., Zhang, Y.Z. & Zhu, X.Q.  
499 *Ascaris suum* enolase is a potential vaccine candidate against ascariasis. *Vaccine*  
500 30(23), 3478-3482 (2012).
- 501 27. Dinis, M., Tavares, D., Veiga-Malta, I., Fonseca, A.J., Andrade, E.B., Trigo, G. &  
502 Ferreira, P. Oral therapeutic vaccination with *Streptococcus sobrinus* recombinant  
503 enolase confers protection against dental caries in rats. *The Journal of infectious*  
504 *diseases* 199(1), 116-123 (2009).
- 505 28. Feng, Y., Pan, X., Sun, W. Wang, C., Zhang, H., Li x & Gao, G.F. *Streptococcus suis*  
506 enolase functions as a protective antigen displayed on the bacterial cell surface. *The*  
507 *Journal of infectious diseases* (10), 1583-1592 (2009).

- 508 29. Wang, J., Wang, K., Chen, D., Geng, Y., Huang, X., He, Y. & Lai, W. Cloning and  
509 characterization of surface-localized  $\alpha$ -Enolase of *Streptococcus iniae*, an effective  
510 protective antigen in mice. *International journal of molecular sciences* 16(7), 14490-  
511 14510 (2015).
- 512 30. Dutta, S., DasSarma, P., DasSarma, S. & Jarori, G.K. Immunogenicity and protective  
513 potential of a Plasmodium spp. enolase peptide displayed on archaeal gas vesicle  
514 nanoparticles. *Malaria journal* 14(1), 406 (2015).
- 515 31. Yu, J., Chen, T., Xie, Z., Liang, P., Qu, H., Shang, M. & Zhou, L. Oral delivery of  
516 *Bacillus subtilis* spore expressing enolase of *Clonorchis sinensis* in rat model: induce  
517 systemic and local mucosal immune responses and has no side effect on liver  
518 function. *Parasitology research* 114(7), 2499-2505 (2015).
- 519 32. Arce-Fonseca M., González-Vázquez, M.C., Rodríguez-Morales, O., Graullera-Rivera  
520 V., Aranda-Fraustro, A., Reyes, P.A. & Rosales-Encina, J.L. Recombinant Enolase of  
521 *Trypanosoma cruzi* as a Novel Vaccine Candidate against Chagas Disease in a Mouse  
522 Model of Acute Infection. *Journal of immunology research* (2018).
- 523 33. Pancholi, V. Multifunctional  $\alpha$ -enolase: its role in diseases. *Cellular and Molecular*  
524 *Life Sciences CMLS* 58(7), 902-920 (2001).
- 525 34. Portuondo, D.L.F., Ferreira, L.S., Urbaczek, A.C., Batista-Duharte, A., Carlos, I.Z.  
526 Adjuvants and delivery systems for antifungal vaccines: current state and future  
527 developments. *Medical mycology* 53: 69-89 (2015).
- 528 35. Kornblatt, M.J., Richard, Albert. J., Mattie, S. Z.J., Dayanandan, S. Hanic- Joyce, P.J.  
529 & Joyce, P.B.M. The *Saccharomyces cerevisiae* enolase- related regions encode  
530 proteins that are active enolases. *Yeast* 30(2), 55-69 (2013).
- 531 36. Brewer, J.M., Fairwell, T., Travis, J. & Lovins, R.E. Investigation of the subunit  
532 structure of yeast enolase. *Biochemistry* 9(4), 1011-1016 (1970).

- 533 37. Zhang, E., Brewer, J.M., Minor, W., Carreira, L.A. & Lebioda, L. Mechanism of  
534 Enolase: The Crystal Structure of Asymmetric Dimer Enolase-2-Phospho-d-  
535 glycerate/Enolase- Phosphoenolpyruvate at 2.0 Å Resolution. *Biochemistry* 36(41),  
536 12526-12534 (1997).
- 537 38. Floden, A.M., Watt, J. A & Brissette, C.A. *Borrelia burgdorferi* enolase is a surface-  
538 exposed plasminogen binding protein. *PloS one* 6(11), e27502 8 (2011).
- 539 39. Ehinger, S., Schubert, W.D., Bergmann, S., Hammers, Schmidt, S. & Heinz, D.W.  
540 Plasmin (ogen)-binding  $\alpha$ -enolase from *Streptococcus pneumoniae*: crystal structure  
541 and evaluation of plasmin (ogen)-binding sites. *Journal of molecular biology* 343(4),  
542 997-1005 (2004).
- 543 40. Wu, Y., Wang, C., Lin, S., Wu, M., Han, L., Tian, C. & Zang, J. Octameric structure  
544 of *Staphylococcus aureus* enolase in complex with phosphoenolpyruvate. *Acta*  
545 *Crystallographica Section D* 71(12), 2457-2470 (2015).
- 546 41. Silva, R.C., Padovan, A.C.B., Pimenta, D.C., Ferreira, R.C., da Silva, C.V. & Briones  
547 MR. Extracellular enolase of *Candida albicans* is involved in colonization of  
548 mammalian intestinal epithelium. *Frontiers in cellular and infection microbiology*, 4,  
549 66 (2014).
- 550 42. Roth, E.J., Calvin, M.C., Max-Audit, I., Rosa, J. & Rosa, R. The enzymes of the  
551 glycolytic pathway in erythrocytes infected with *Plasmodium falciparum* malaria  
552 parasites. *Blood* 72(6), 1922-1925 (1988).
- 553 43. Marcos, C.M., de Fátima, da Silva. J., de Oliveira, H.C., Moraes, da Silva. R.A.,  
554 Mendes-Giannini, M.J.S. & Fusco-Almeida, A.M., Surface-expressed enolase  
555 contributes to the adhesion of *Paracoccidioides brasiliensis* to host cells. *FEMS yeast*  
556 *research* 12(5), 557-570 (2012).
- 557 44. Charoenvit, YUPI. N. & Taylor, R.L. Experimental sporotrichosis in Syrian  
558 hamsters. *Infection and immunity* 23(2), 366-372 (1979).

- 559 45. Nascimento, R.C. & Almeida, S.R. Humoral immune response against soluble and  
560 fractionate antigens in experimental sporotrichosis. *FEMS Immunology & Medical*  
561 *Microbiology* 43: 241-247 (2005)
- 562 46. Nascimento, R.C., Espindola, N.M., Castro, R.A., Teixeira, P.A., Loureiro, Penha,  
563 C.V. et al. Passive immunization with monoclonal antibody against a 70- kDa putative  
564 adhesin of *Sporothrix schenckii* induces protection in murine sporotrichosis. *European*  
565 *journal of immunology* 38: 3080-3089 (2008).
- 566 47. Almeida-Paes, R., De Oliveira, L.C., Oliveira, M.M.E., Gutierrez-Galhardo, M.C.,  
567 Nosanchuk, J., D, Zancopé-Oliveira, R.M. Phenotypic characteristics associated with  
568 virulence of clinical isolates from the *Sporothrix* complex. *BioMed research*  
569 *international* 1-10 (2015).
- 570 48. Lin, L., Ibrahim, A.S., Xu, X., Farber, J.M., Avanesian, V., Baquir, B. & Spellberg, B.  
571 Th1-Th17 cells mediate protective adaptive immunity against *Staphylococcus aureus*  
572 and *Candida albicans* infection in mice. *PLoS pathogens* 5(12), e1000703 (2009).
- 573 49. Ferreira, L.S., Goncalves, A.C., Portuondo, D.L., Maia, D.C.G., Placeres, M.C.P.,  
574 Batista-Duharte, A. et al. Optimal clearance of *Sporothrix schenckii* requires an intact  
575 Th17 response in a mouse model of systemic infection. *Immunobiology* 220: 985-992  
576 (2015).
- 577 50. Batista-Duharte, A., Téllez-Martínez, D., de Andrade, C.R., Portuondo, D.L.,  
578 Jellmayer, J.A., Polesi, M.C. & Carlos, I.Z. *Sporothrix brasiliensis* induces a more  
579 severe disease associated with sustained Th17 and regulatory T cells responses than  
580 *Sporothrix schenckii* sensu stricto in mice. *Fungal Biology* (2018).
- 581 51. Zhang, A., Chen, B., Mu, X., Li, R., Zheng, P., Zhao, Y. & Jin, M. Identification and  
582 characterization of a novel protective antigen, Enolase of *Streptococcus suis* serotype  
583 2. *Vaccine* 27(9), 1348-1353 (2009).



- 584 52. Chen, N., Yuan, Z.G., Xu, M.J., Zhou, D.H., Zhang, X.X., Zhang, Y.Z. *et al.* *Ascaris*  
585 *suum* enolase is a potential vaccine candidate against ascariasis. *Vaccine* 30(23), 3478-  
586 3482. *Clin Microbiol Infect* 2009 Jul; 15(7):651-5 (2012).
- 587 53. Bohm, G., Muhr, R., Jaenicke, R. Quantitative-Analysis of Protein Far Uv Circular-  
588 Dichroism Spectra by Neural Networks. *Protein Eng* 5: 191–195 (1992).
- 589 54. Laemmli, U.K. Cleavage of structural proteins during the assembly of the head of  
590 bacteriophage T4. *Nature* 227(5259), 680 (1970).
- 591 55. Sievers, F., Wilm, A., Dineen, D., Gibson, T.J., Karplus, K., Li, W. *et al.* Fast, scalable  
592 generation of high-quality protein multiple sequence alignments using ClustalOmega.  
593 *Mol Syst Biol* 7:539 (2011).
- 594 56. Ishida, K., Castro, R.A., Torrado, J.J., Serrano, D.R., Borba-Santos, L.P., Quintella,  
595 L.P. & Lopes-Bezerra, L.M. Efficacy of a poly-aggregated formulation of amphotericin  
596 B in treating systemic sporotrichosis caused by *Sporothrix brasiliensis*. *Medical*  
597 *mycology* 56(3), 288-296 (2017).

598  
599  
600  
601  
602  
603  
604  
605  
606  
607  
608  
609  
610  
611  
612  
613  
614  
615  
616  
617  
618  
619  
620

## 621 **Legends**

622

623

624 **Fig. 1. SDS-PAGE and structure analysis of rSsEno expressed in *E. coli* BL21.** The recombinant  
625 plasmid pET28a::SsEno-transformed *E. coli* BL21 cells were induced in the presence of 0,2 mM IPTG for  
626 4h at 30 °C. The cells were lysed by sonication, and the supernatant with the recombinant protein was  
627 purified by affinity and molecular exclusion chromatography, respectively. All the samples were analyzed  
628 by SDS-PAGE 12%, and the protein was stained with Coomassie Blue R250 in the gel. (A) Expression and  
629 purification of rSsEno. Molecular mass markers in kDa (1), non-IPTG-induced pET28a::SsEno-  
630 transformed-BL21 cells lysate (2), IPTG-induced pET28a::SsEno-transformed-BL21 cells lysate (3); pellet  
631 of IPTG-induced pET28a::SsEno-transformed-BL21 cells (4), supernatant of lysed IPTG-induced  
632 pET28a::SsEno-transformed-BL21 cells (5), rSsEno purified by Ni<sup>2+</sup> affinity chromatography (6) and size  
633 exclusion chromatography (7). (B) The CD spectrum shows that rSsEno was obtained mainly with a  
634 secondary structure composed by  $\alpha$ -helices. (C) Analytical size exclusion chromatography performed for  
635 rSsEno. The MW standard protein mix elution pattern is represented by the red line: 1) Apoferritin (480  
636 kDa); 2)  $\gamma$ -Globulin (160 kDa); 3) BSA (67 kDa); 4) carbonic anhydrase (29 kDa); 5) Cytochrome C (12  
637 kDa).

638

639 **Fig.2. Multiple sequence alignments of *S. schenckii*.** The deduced amino acid sequence of *S. schenckii*  
640 (ERS97971.1), *Felis catus* (M3WCP0\_FELCA) and *Homo sapiens* (P06733) were aligned by the Clustal  
641 Omega server. The conserved amino acids in all sequences are labeled with asterisks; the conservative and  
642 semi-conservative substitutions are labeled with two and one points, respectively. The percentage of amino  
643 acid sequence identity between all enolases is indicated.

644

645 **Fig. 3. Western blot analysis showing the specificity of the anti-rSsEno sera and the reactivity of the**  
646 **sera from cats with sporothricosis against rSsEno.** Samples Ss16345-CWP and rSsEno were tested by  
647 12% SDS-PAGE under nonreducing conditions and after immobilization on a nitrocellulose membrane.  
648 The strips were incubated at 37 °C for 1 h with anti-rSsEno serum or naïve mouse serum, and the  
649 immunoblots were visualized by adding 3,3'-diaminobenzidine substrates after being treated with goat  
650 anti- mouse IgG-HRP. Panel A, column 1: molecular weight marker; column 2: Ss16345-CWP resolved by

651 SDS- PAGE 12%. column 3 and 4: nitrocellulose strips containing the Ss16345-CWP treated with NS and  
652 anti- rSsEno serum, respectively. Column 5 and 6: nitrocellulose strips containing rSsEno treated with naïve  
653 mice-serum and anti-rSsEno serum, respectively. Panel B, strips containing rSsEno were incubated with  
654 sera from cats with or without sporotrichosis (NS) and immunoblots were incubated with goat anti-feline  
655 IgG-HRP. Each cat serum is identified by the admission number of the Laboratory of Clinical Research in  
656 Dermatozoonoses in Domestic Animals of the National Institute of Infectology Evandro Chagas  
657 (FIOCRUZ). The resulting blots were cropped to show the bands of interest and received equal exposure  
658 levels.

659 **Figure 4. Demonstration of the enolase on the cell surface of *Sporothrix sp*-yeasts by flow cytometry**  
660 **and electron microscopy.**

661

662 A Ss16345, Ss1099-18, Ss250 and Ss256 yeasts suspension was previously incubated with anti-rSsEno  
663 serum (SAE) or serum from nonimmunized mice (NIS) for 1 h at 37 °C. After washing, the cells were  
664 exposed to FITC rabbit anti-mouse IgG and examined using a flow cytometer. (A, C, E and G)  
665 Representative histograms from one of three independent experiments for the indicated *Sporothrix spp*  
666 yeasts treated with NIS (black line) or SAE (blue, red, green or yellow line). Bar graphs show the median  
667 fluorescence intensity (MFI) for Ss16345 (B), Ss1099-18 (D), Ss250 (F) and Ss256 (H). The results are  
668 presented as the mean  $\pm$  SD of three independent experiments, and statistical significance was determined  
669 by a's student paired *t* test. \*,  $P < 0.05$ ; \*\*\*  $P < 0.001$ . Ultrathin sections of each fungus were incubated  
670 overnight with anti-anti-rSsEno (SAE) serum or serum from nonimmunized mice (NIS) following treatment  
671 overnight with the Au-conjugated secondary antibody, rabbit IgG, at 4 °C. Grids were observed with a Jeol  
672 1011 transmission electron microscope after being stained with uranyl acetate and lead citrate. (I) shows  
673 Ss16345-yeasts. (J) shows Ss16345-yeasts treated with NIS. (K and L) show the enolase (Eno) on the cell  
674 wall (CW) or cytoplasm (C) of the Ss16345-yeasts treated with SAE. (M) shows the Eno on CW of the  
675 Ss1099-18-yeasts treated with SAE. (N) shows Eno in the cytoplasm or CW of the Ss250-yeasts treated

676 with SAE, respectively. (O and P) representative images showing Eno on the CW of the Ss256-yeasts  
677 treated with SAE.

678

679 **Fig. 5. Immunization with rSsEno with or without PGA conjugation enhanced the antibody response.**

680 BALB/c mice were s.c. immunized three times with rSsEno100, PGA+ rSsEno100 or PBS as a negative  
681 control. Sera collected seven days after the last boost was used to determine antigen-specific IgG (A), IgG1  
682 (B) and IgG2a (C) titers by ELISA. The results are presented as the mean  $\pm$  SD of 5 mice from one of three  
683 independent experiments, and statistical significance was determined by one-way ANOVA using Tukey's  
684 multiple comparisons test and a 95% confidence interval. Different letters represent significant differences  
685 ( $p < 0.05$ ) between treatments.

686

687 **Fig. 6. Vaccinated mice with rSsEno100 and PGA+rSsEno100 showed differences in Th1, Th2 and**

688 **Th17 cytokine profiles.** BALB/c mice were s.c. immunized three times with rSsEno100, PGA+rSsEno100  
689 or PBS as a negative control. Total splenocytes of each animal were obtained seven days after the last  
690 immunization and stimulated in vitro with rSsEno. After 24 h of incubation, supernatant-accumulated  
691 cytokines (IL-2, IL-4, IL-6, IL17A, IFN- $\gamma$ , TNF and IL-10) were measured by cytokine cytometric bead  
692 array kit ELISA. The results are presented as the mean  $\pm$  SD of 5 mice from one of three independent  
693 experiments, and statistical significance was determined by one-way ANOVA using Tukey's multiple  
694 comparisons test and a 95% confidence interval. Different letters represent significant differences ( $p < 0.05$ )  
695 between treatments.

696

697 **Fig. 7. Vaccination of mice with rSsEno with or without PGA adjuvant conferred protection against**

698 **infection with *S. brasiliensis* (Ss250).** BALB/c mice were immunized (s.c.) three times with the indicated  
699 formulations. One week after the last boost, mice were challenged intravenously with  $1 \times 10^5$  Ss250 yeast-  
700 form cells. The survival of the mouse groups was monitored daily for 45 days postchallenge (n=10 in all  
701 groups).

702

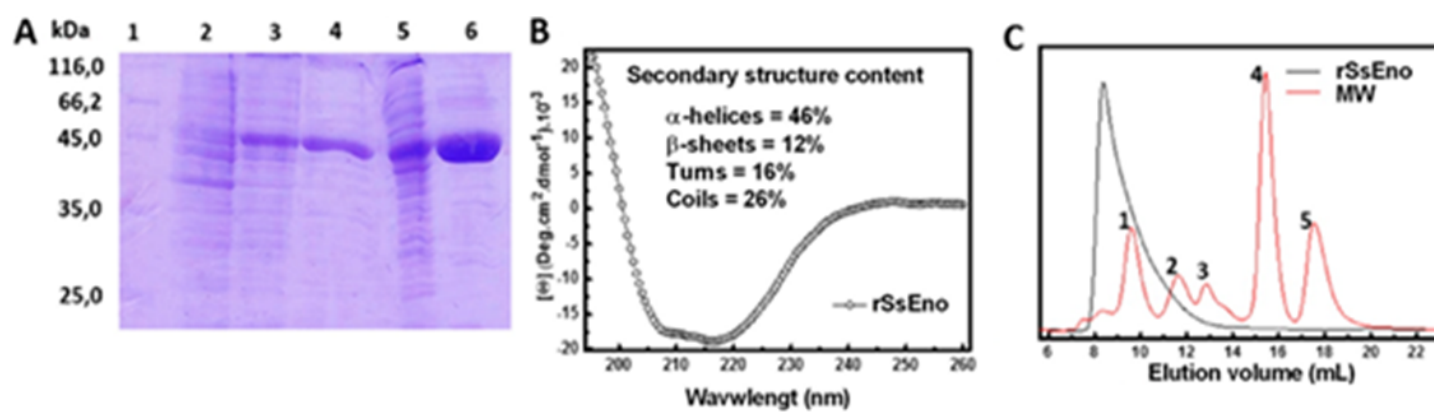

```

S. Schenckii MAITKIHARYVYDSRGNPTVEVDVVTETGLHRAIVPSGASTGQHEACELRDGDKKWKGGK 60
F. catus MSILKVHAREIFDSRGNPTVEVDLYTSKGLFRAAVPSGASTGIYEALERDNDKTRYMGK 60
H. sapiens MSILKIHAREIFDSRGNPTVEVDLFTSKGLFRAAVPSGASTGIYEALERDNDKTRYMGK 60
*: * :*** :;*****; * :** ** ***** ;** **** ** :; **

S. Schenckii GVLTAVKVNEIIGPAI I KEAVDVKDQSKVDKFLIDLDTGTPNKTKLGANAILGVS LAIAK 120
F. catus GVSKAVEHINKTIAPALISKKLSVVEQEKIDKLM IEMDGTENKSKFGANAILGVS LAVCK 120
H. sapiens GVSKAVEHINKTIAPALVSKKLVTEQEKIDKLM IEMDGTENKSKFGANAILGVS LAVCK 120
** .**::: : * .**::: : . * : * .**::: : ***** ** : ***** .**

S. Schenckii AGAAEKGVPLYRHADLAGN- EVILPVPAPFNVI NGGSHAGNKLAMQEFMILPVGANFR 179
F. catus AGAVEKGVPLYRHADLAGN- EVILPVPAPFNVI NGGSHAGNKLAMQEFMILPVGANFR 179
H. sapiens AGAVEKGVPLYRHADLAGN- EVILPVPAPFNVI NGGSHAGNKLAMQEFMILPVGANFR 179
*** .***** * : ***** . ***** : ***** .** : ***** * . *

S. Schenckii EALRWGAEVYQQLKSLAKKKYGQSAGNVGDEGGVAPDIQTADAELELIAEAIKAGYTGR 240
F. catus EAMRIGAEVYHNLKNVIKEKYGKDATNVGDEGGFAPNI LENKEALELLKNAIGKAGYTDK 239
H. sapiens EAMRIGAEVYHNLKNVIKEKYGKDATNVGDEGGFAPNI LENKEGLELLKTAIGKAGYTDK 239
** : * ***** : ** : * : ** : * ***** .** : * .** : ** ***** :

S. Schenckii MNIAMDVASSEFYKEDVKKYDLDFKNPESDPTKWITYEQLAQIYSDLSKKYPIVSIEDPF 300
F. catus VVIGMDVAASEFFRS--GKYDLDFKSPD-DPSRYITPDELANLYKSFIRDYPVVSIEDPF 296
H. sapiens VVIGMDVAASEFFRS--GKYDLDFKSPD-DPSRYISPDQLADLYKSFIRDYPVVSIEDPF 296
: * .***** : ** : . ***** .** : ** : * : ** : * .** : *****

S. Schenckii AEDDWEAWSYFYKTQNIQIVGDDLTVTNPLRIKKAIELKACNALLKVNQIGTLTESIQA 360
F. catus DQDDWEAWQKFTASAGIQVVGDDLTVTNPKRISKAVNERSCNCLLLKVNQIGSVTESLQA 356
H. sapiens DQDDWGAWQKFTASAGIQVVGDDLTVTNPKRIKAVNEKSCNCLLLKVNQIGSVTESLQA 356
:*** ** . * : .** : ***** ** ** : : ** : ***** : ***** **

S. Schenckii AKDSYADGWGMVSHRSGETEDVTIADIVVIRSGEIKTGAPARSERLAKLNQLRIEE 420
F. catus CKLAQSNWGMVSHRSGETEDTFIADLVVGLCTGQIKTGAPCRSERLAKYNQLRIEE 416
H. sapiens CKLAQANGWGMVSHRSGETEDTFIADLVVGLCTGQIKTGAPCRSERLAKYNQLRIEE 416
.* : : ***** . ** : ** : * : ***** .** : *****

S. Schenckii LGENAVYAGKNFRTSVNI----438
F. catus LGSKAKFAGRSFRNPLANLLPL438
H. sapiens LGSKAKFAGRFRNPLAK----434
** : * : ** : * .** :

```

Percent Identity Matrix

|                        |        |        |        |
|------------------------|--------|--------|--------|
| 1: <i>S. Schenckii</i> | 100.00 | 62.21  | 62.90  |
| 2: <i>F. catus</i>     | 62.21  | 100.00 | 95.62  |
| 3: <i>H. sapiens</i>   | 62.90  | 95.62  | 100.00 |

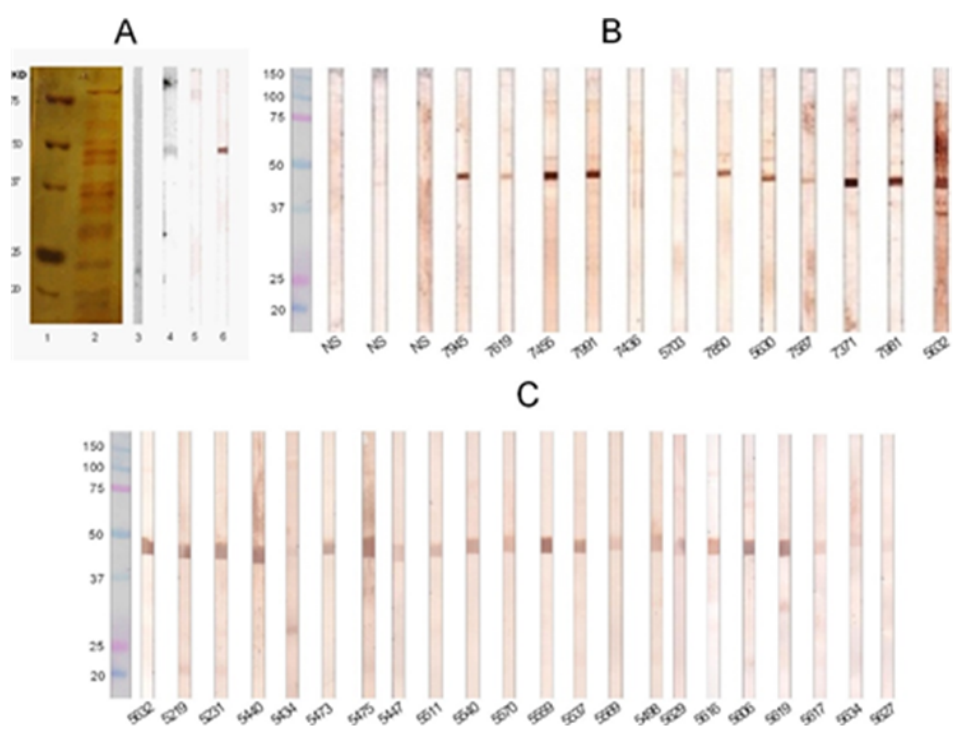

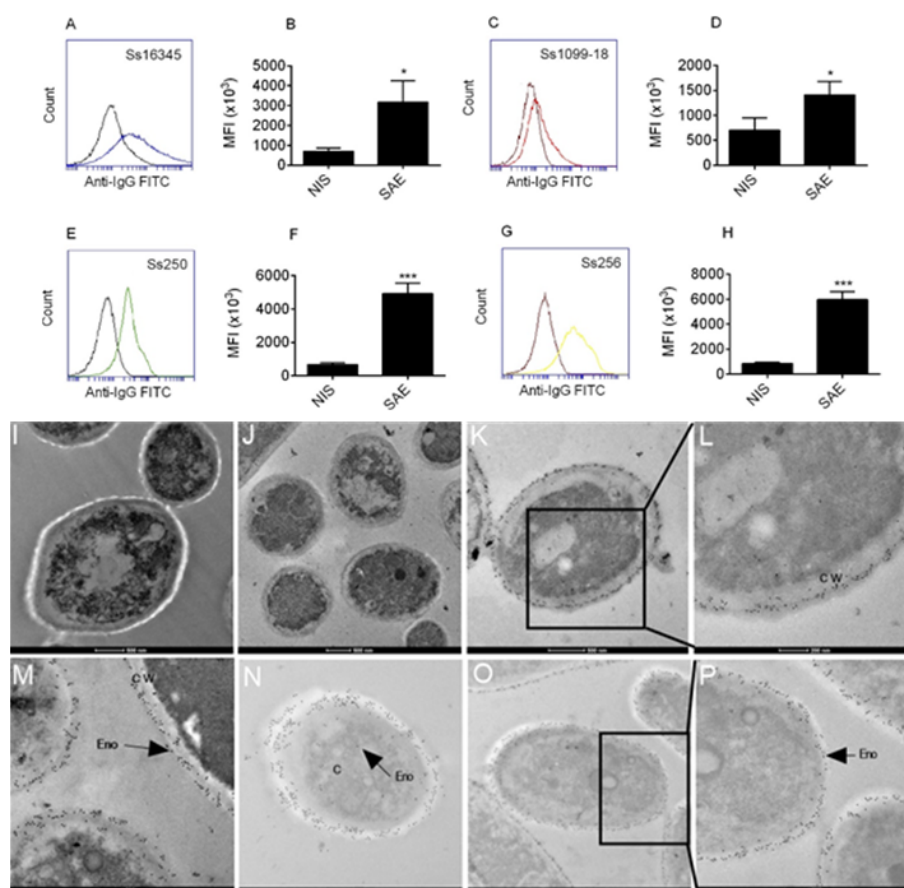



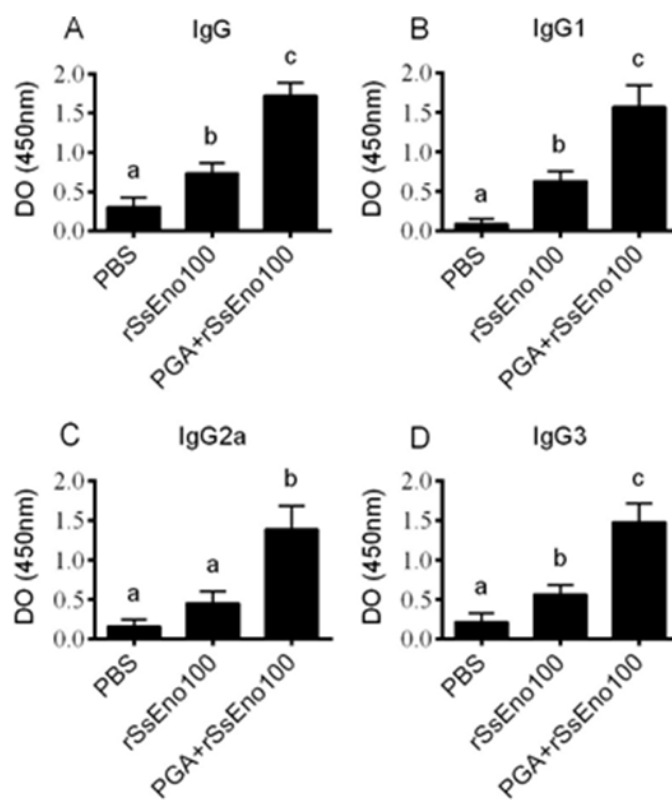

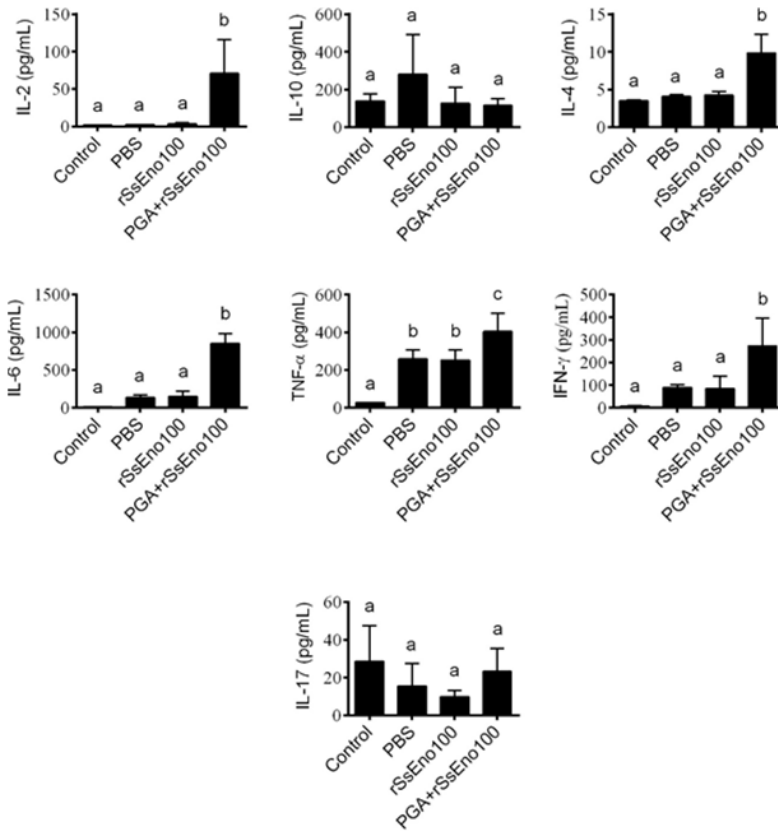

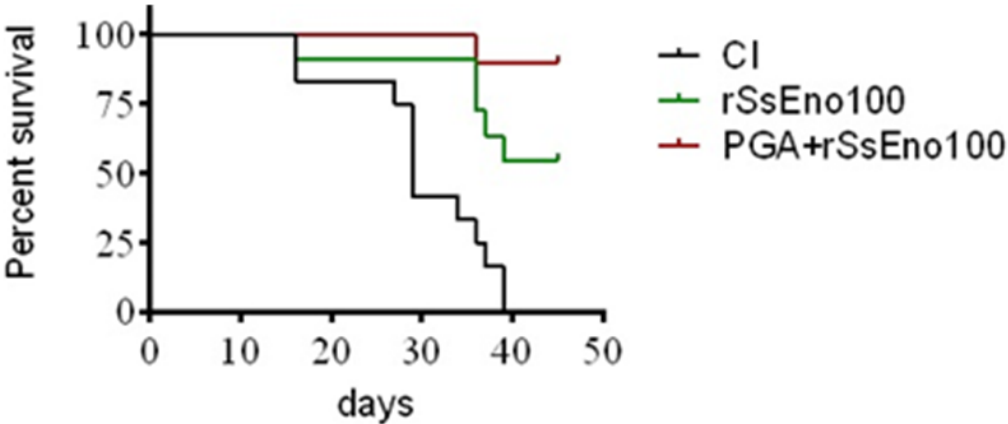

Source: https://www.biorxiv.org/content/10.1101/541029v1.full.pdf
